# Supplementary material for: A DNA base-specific sequence interposed between CRX and NRL contributes to RHODOPSIN expression
Source: Springer Nature journal article supplement (doi:10.1038/s41598-024-76664-8), 2024-11-01
Supplement: MOESM1 [file 41598_2024_76664_MOESM1_ESM.pdf]

## Supporting Information for

A DNA base-specific sequence interposed between CRX and NRL  
contributes to RHODOPSIN expression.

Rosa Maritato<sup>1</sup>, Alessia Medugno<sup>1</sup>, Emanuela D'Andretta<sup>1</sup>, Giulia De Riso<sup>2,3</sup>, Mariangela Lupo<sup>4</sup>, Salvatore Botta<sup>6</sup>, Elena Marrocco<sup>4</sup>, Mario Renda<sup>4</sup>, Martina Sofia<sup>4</sup>, Claudio Mussolino<sup>7</sup>, Maria Laura Bacci<sup>5</sup>, and Enrico Maria Surace<sup>1\*</sup>

Corresponding Author: Enrico Maria Surace  
Email: [enicomaria.surace@unina.it](mailto:enicomaria.surace@unina.it)

**A**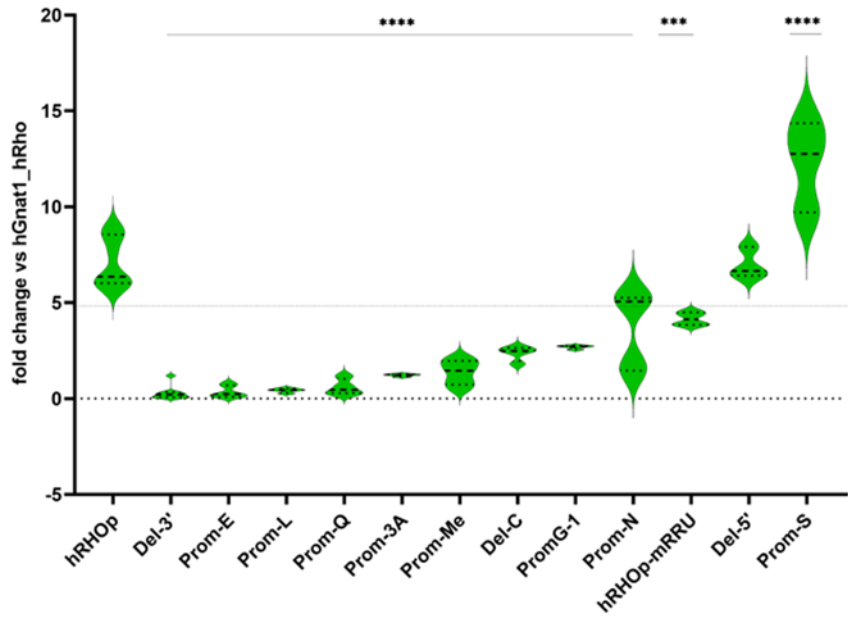**B**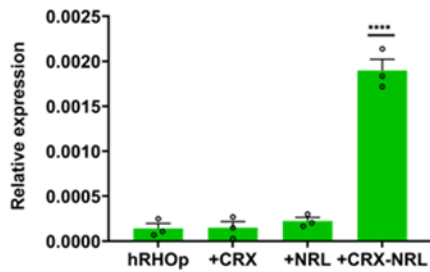**C**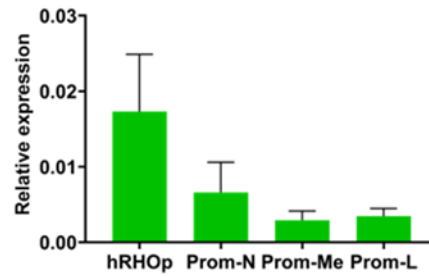

**Fig. S1.** (A) Cumulative eGFP variations across the promoters tested in vivo, normalized to wild-type promoter. (B) To test promoter activation in vitro the cells HEK-293 were transfected with hRHOp and its transactivating transcription factors CRX and NRL. (C), In vitro (HEK-293) transfection of hRHOp and mutants as indicated.

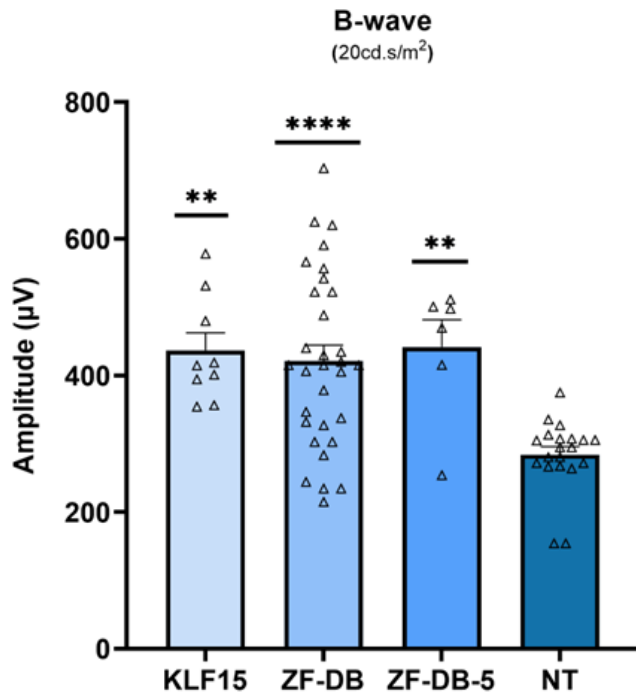

**Fig. S2.** Electroretinography (ERG) analysis on P347S mice subretinally injected at post-natal day 14 (PD14) with AAV8-CMV-ZF-DB (n=10), AAV8-CMV-ZF-DB-5 (n=6), AAV8-CMV-KLF15 (n=9), or AAV8-CMV-eGFP (n=20) and analysed at P30. Preservation of retinal maximal responses, scotopic (dim light) B-waves amplitudes evoked by light flash at +1.3 log cd\*s/m<sup>2</sup> (which correspond to 1x10<sup>-5.2</sup> to 20.0 cd\*s/m<sup>2</sup>), were preserved in AAV8-CMV-ZF-DB, ZF-DB-5 and KLF15 compared to eGFP control.

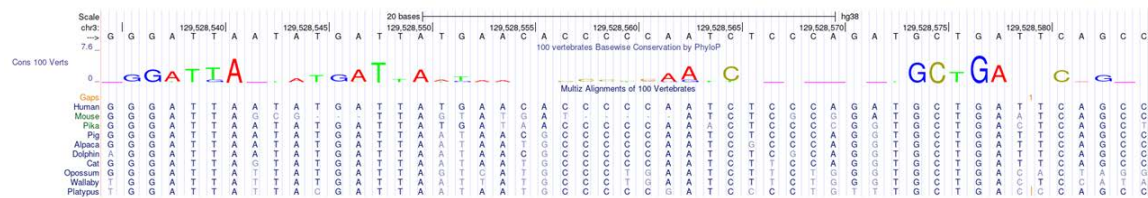

**Fig. S3.** Evolutionary conservation of RHO promoter. Upper panel: logo of basewise conservation by PhyloP. Lower panel: multiple sequence alignment of representative mammalian species among 100 vertebrates.

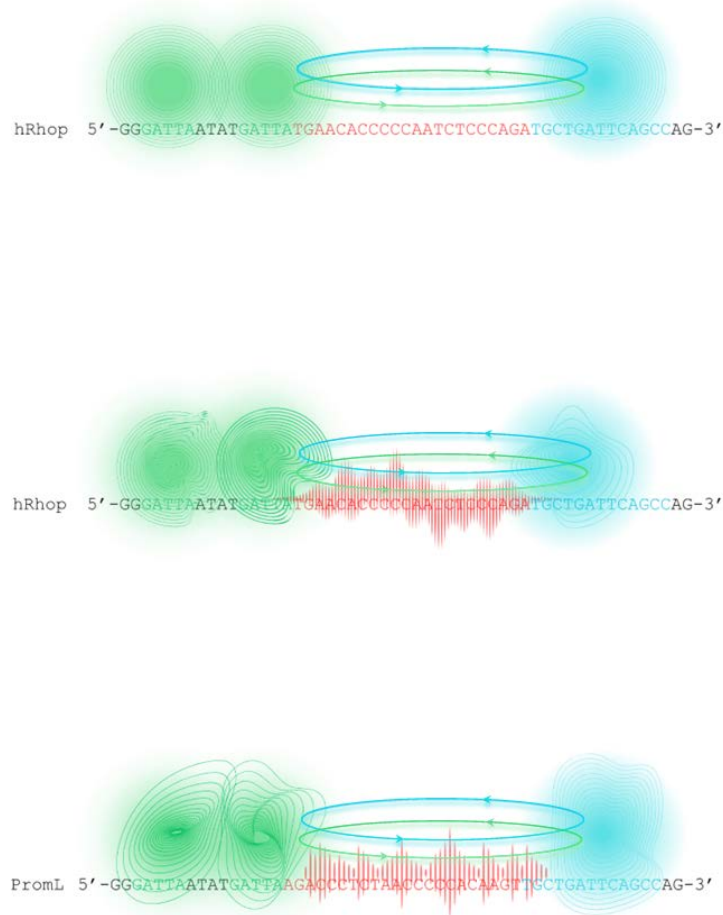

**Fig.S4.** Graphical representation modelling the novel DNA-TF interaction mechanism proposed. Top drawing shows standard model (TFs binding-dependent mechanisms) of TFs interaction with their respective binding sites. CRX and NRL TFs and their binding sites are represented in green and light blue respectively, and their TF-TF interaction is represented by light blue and green arrows. In the middle and bottom drawings, the binding-independent interaction mechanism proposed, mediated by the DNA itself. Distinct DNA bases composition (and length) of the DNA-linker (red sequence; middle drawing, hRHOp DNA-linker; bottom, hRHOp DNA-linker arranged in the opposite orientation 5'-3', Prom-L in the text) differentially impact (red waves) on TF-TF activity adding to TFs binding-dependent mechanisms (top drawing), eventually leading to differential gene expression levels.
